# Supplementary material for: C-met+ CTLs Exhibit Enhanced Cytotoxicity in Mouse and Human In Vitro Tumor Models
Source: Preprints.org preprint supplement (doi:10.20944/preprints202310.0583.v1), 2023-10-10
Supplement: Supplementary file 1 [file supplementary]

**Table S1: Antibodies for flow cytometry**

| **Antibodies** | **Species reactivity** | **Clone** | **Fluorochrome** | **Supplier** | **RRID number** |
| --- | --- | --- | --- | --- | --- |
| CD3 | Anti-mouse | 145-2C11 | BV421 | BD Horizon | AB_11153670 |
| CD8 | Anti-mouse | 53-6.7 | BUV395 | BD Horizon | AB_2732919 |
| c-Met | Anti-mouse | eBioclone7 | FITC | Invitrogen | AB_494112 |
| V13 | Anti-mouse | MR12-3 | APC | Invitrogen | AB_2573224 |
| IFN | Anti-mouse | XMG1.2 | BUV737 | BD Horizon | AB_2870098 |
| Granzyme B | Anti-mouse | NGZB | APC ef780 | Invitrogen | AB_2716966 |
| TNF | Anti-mouse | MP6-XT22 | PEcy7 | Invitrogen | AB_11042728 |
| CD107a | Anti-mouse | 1D4B | BV786 | BD Horizon | AB_2738762 |
| KLRG-1 | Anti-mouse | 2F1 | BV421 | BD Horizon | AB_2737875 |
| PD-1 | Anti-mouse | J43 | APC ef780 | Invitrogen | AB_2574002 |
| CTLA-4 | Anti-mouse | UC10-4F10-11 | APC-R700 | BD Horizon | AB_2739350 |
| CD178/FasL | Anti-mouse | MFL3 | PE | BD OptiBuild | AB_395711 |
| LAG-3 | Anti-mouse | eBioC9B7W (C9B7W) | PE | Invitrogen | AB_494214 |
| Tim-3 | Anti-mouse | 5D12/TIM-3 | BV480 | BD OptiBuild | AB_2744184 |
| CD3 | Anti-human | UCHT1 | PE-Cy7 | Biolegend | AB_439781 |
| CD8 | Anti-human | SK1 | APC-Cy7 | BD Horizon | AB_2044005 |
| c-Met | Anti-human | 95106 | FITC | R&D System | AB_1026292 |
| IFN | Anti-human | 4S.B3 | APC | Invitrogen | AB_469506 |
| Granzyme B | Anti-human | GB11 | PE | Invitrogen | AB_1659718 |

**Figure S1**

**
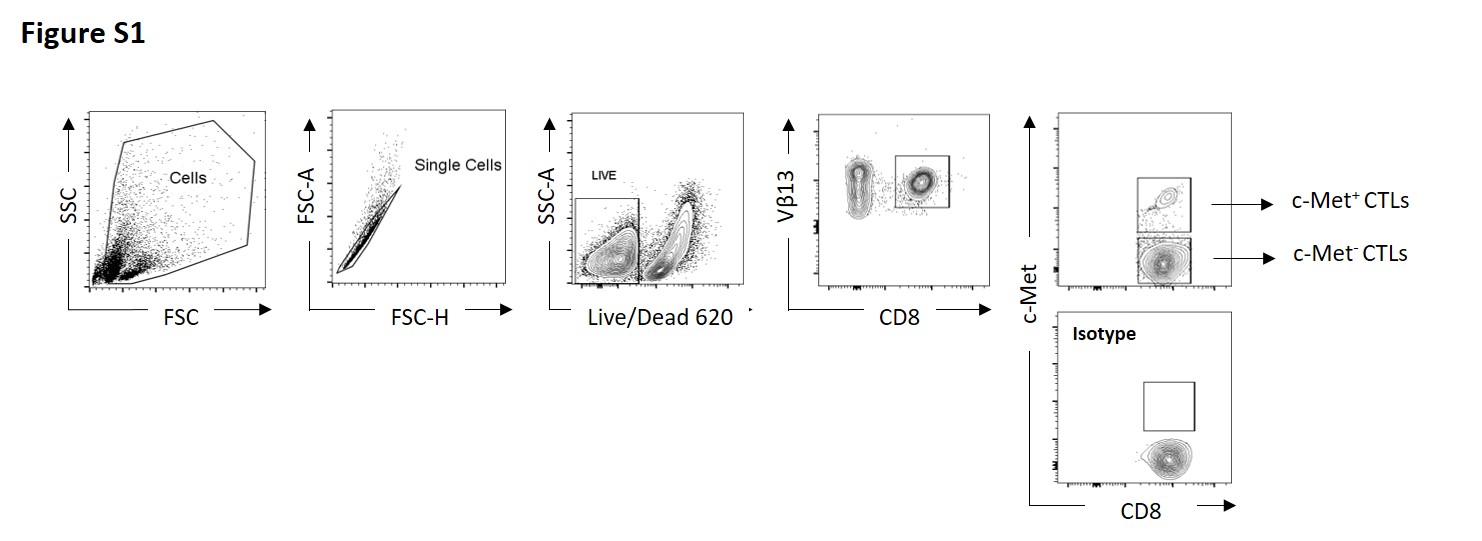
**

**Figure S1. Flow cytometry gating strategy for the identification of Pmel-1 CD8+V13+ T cells**

Live lymphocytes were first selected for their morphology using FSC/SSC parameters, followed by the exclusion of doublets and dead cells (LD620), and CD8+V13+ T lymphocytes were subsequently selected. c-Met expression was defined with FMO control condition.

**Figure S2**

**
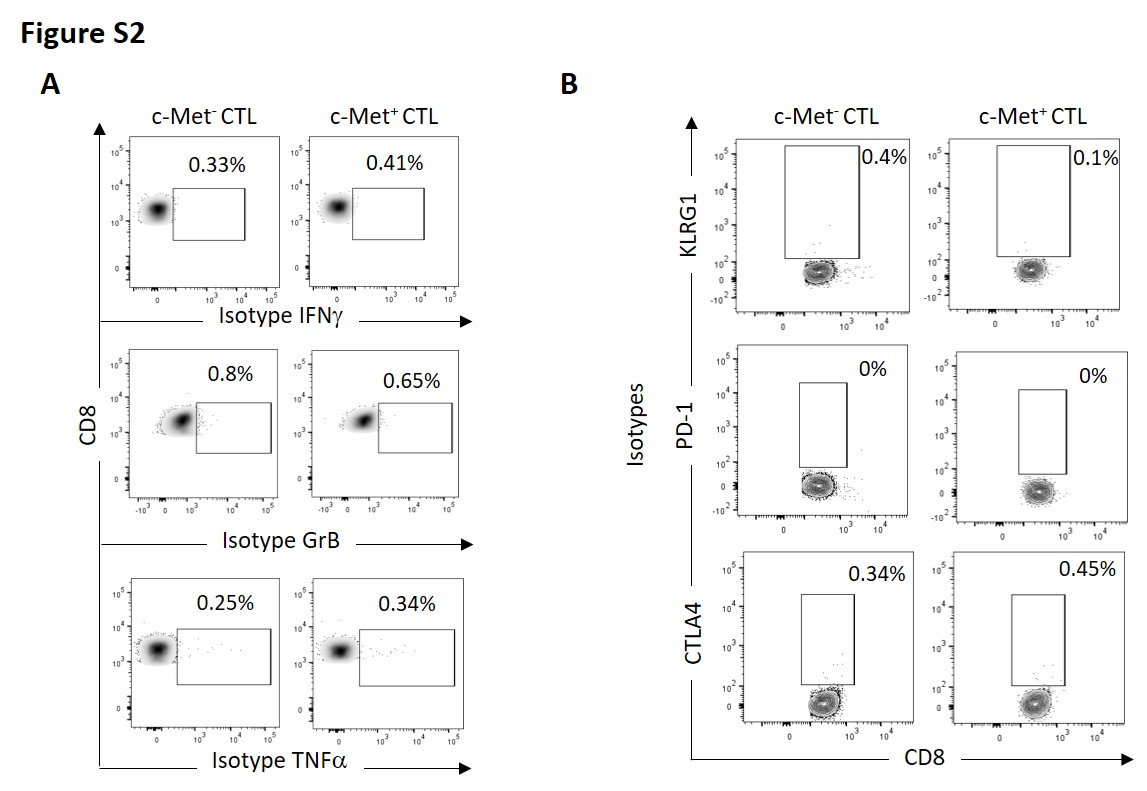
**

**Figure S2. Isotypes controls presentation**

Representative density (**A**) and contour plot (**B**) of isotype controls of IFN, GrB and TNF (**A**) and KLRG1, PD-1 and CTLA-4 (**B**).

**Figure S3**

**
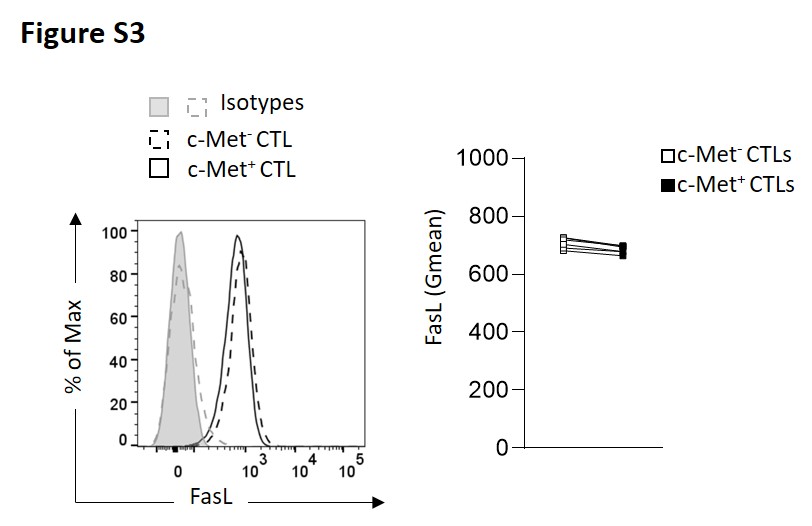
**

**Figure S3. FasL expression by CTLs in contact with B16 Spheroids**

Representative histogram (left panel) and paired flow cytometry quantifications (right panel) of FasL 4h after co-culture of B16 spheroids and CTLs c-Met+ vs c-Met- from six experiments of (n=6 mice). P-values were calculated using a paired *t*-test.

**Figure S4**

**
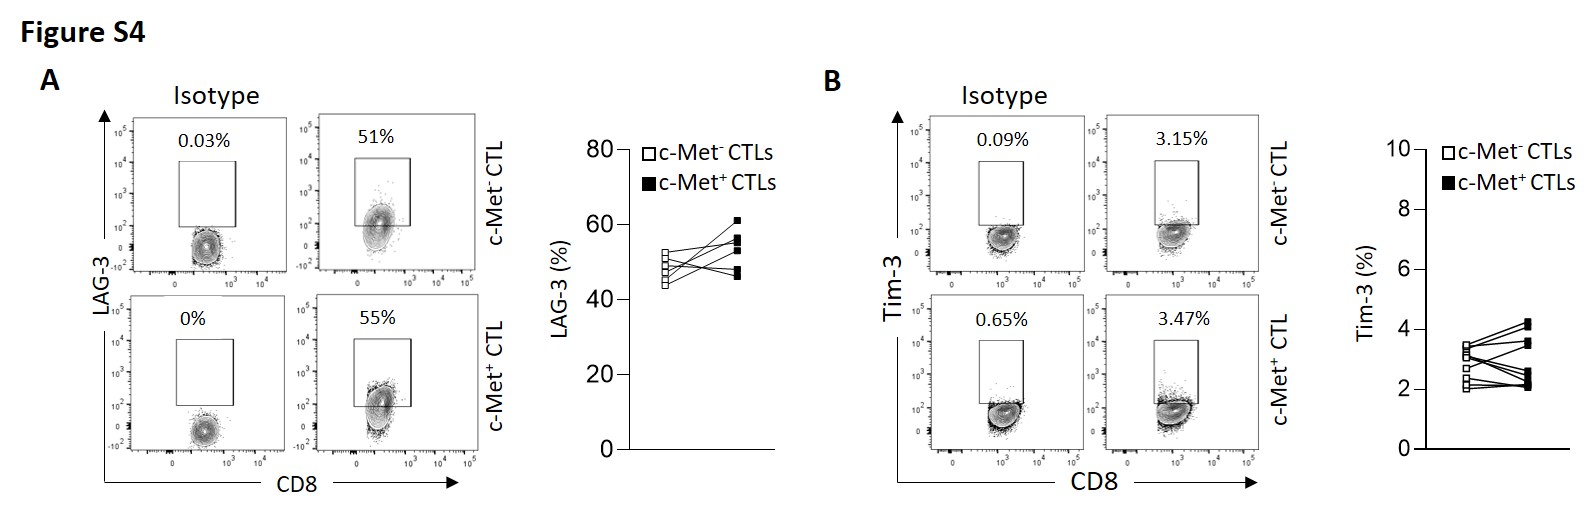
**

**Figure S4. LAG-3 and Tim-3 expression by CTLs in contact with B16 Spheroids**

**(A, B)** Representative contour plots (left panel) and paired flow cytometry quantifications (right panel) of LAG-3 and Tim-3 respectively 4h after co-culture of spheroids B16 and CTLs c-Met+ vs c-Met- from six experiments of (n=6 mice). P-values were calculated using paired *t*-test.
